# Supplementary figures and images for: Extended Superior Dermoglandular Pedicle Approach: A Versatile Technique for a Variety of Breast Deformities
Source: PubMed Central journal article supplement — Plast Reconstr Surg Glob Open. 2023 Nov 20;11(11):e5430. doi: 10.1097/GOX.0000000000005430 (PMC10659736; doi:10.1097/gox.0000000000005430), 2023-11-20

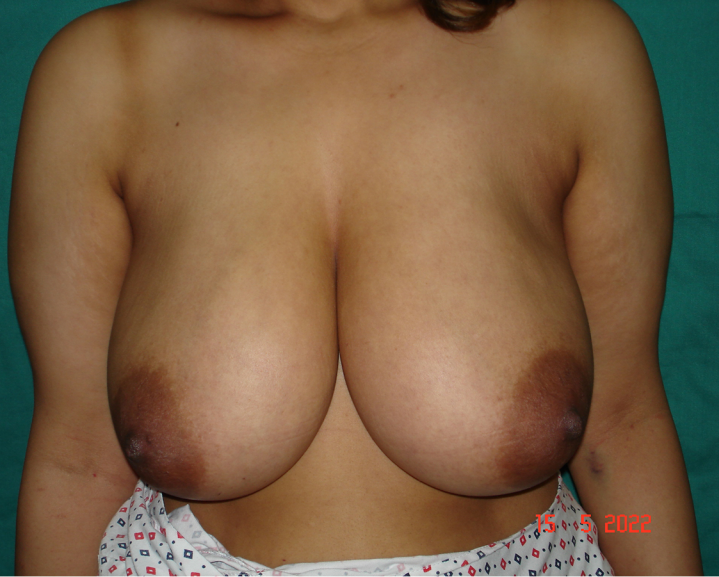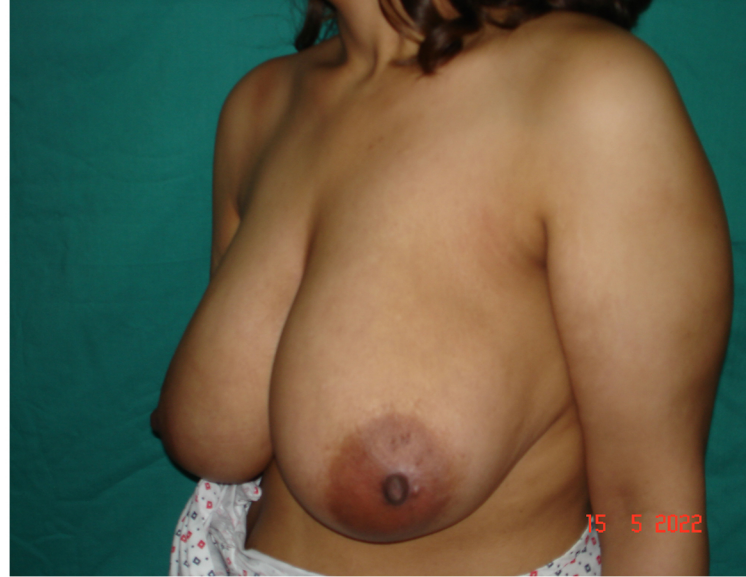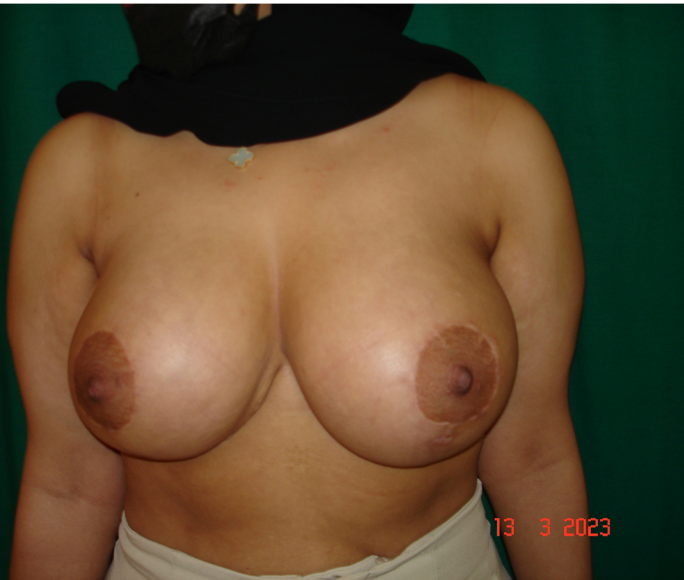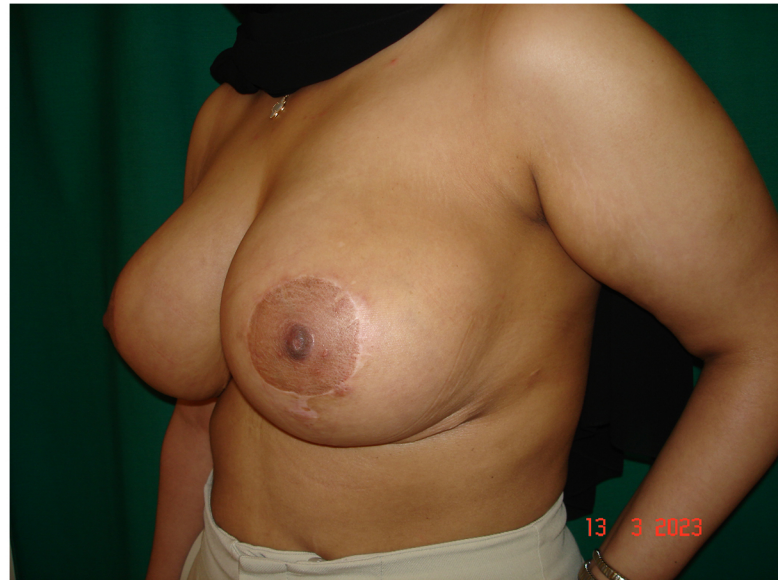

Supplement: gox-11-e5430-s005.pdf [file gox-11-e5430-s005.pdf]

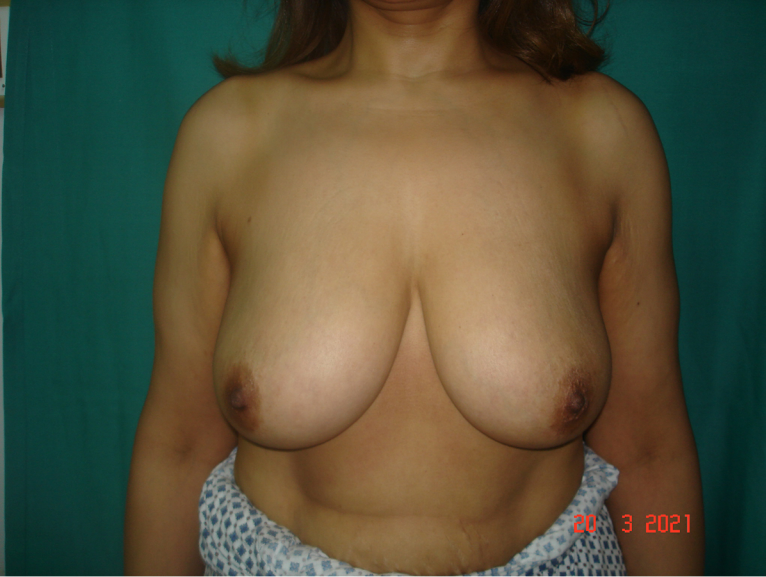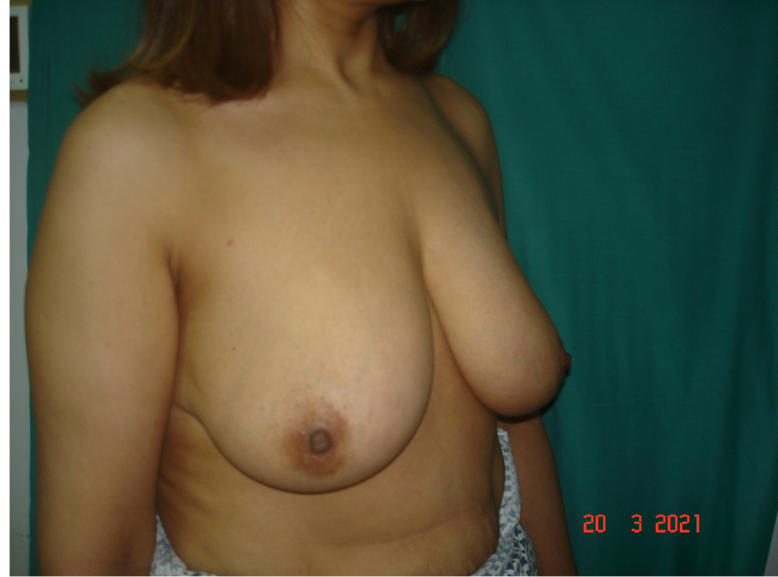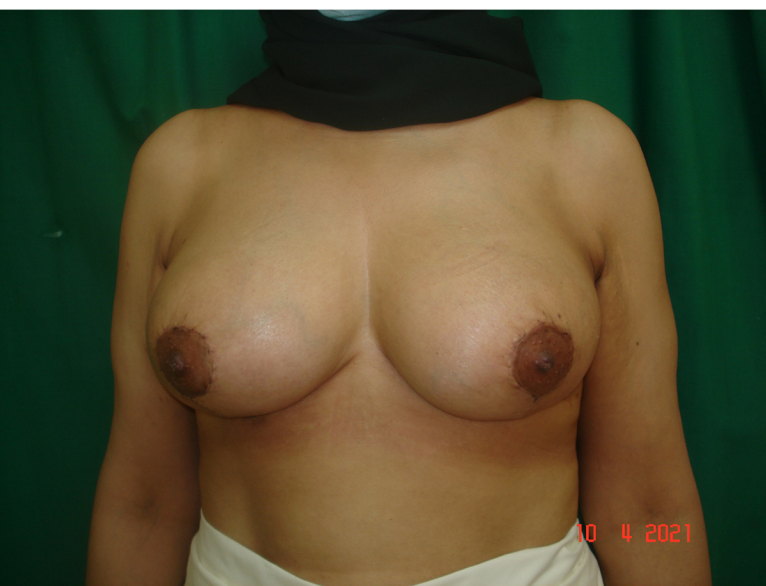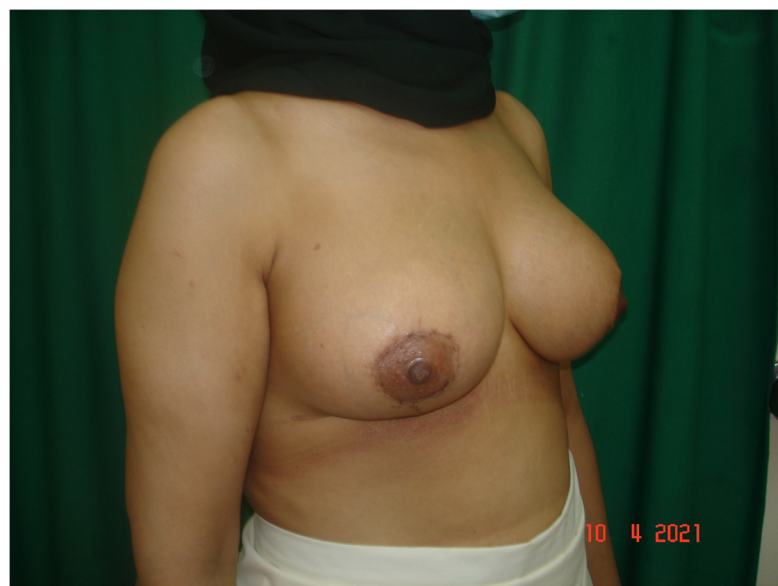

Supplement: gox-11-e5430-s006.pdf [file gox-11-e5430-s006.pdf]
